# Supplementary material for: A method to generate the surface cell layer of the 3D virtual shoot apex from apical initials
Source: PubMed Central journal article supplement (PMC5725887; doi:10.1186/s13007-017-0262-7), 2017-12-11

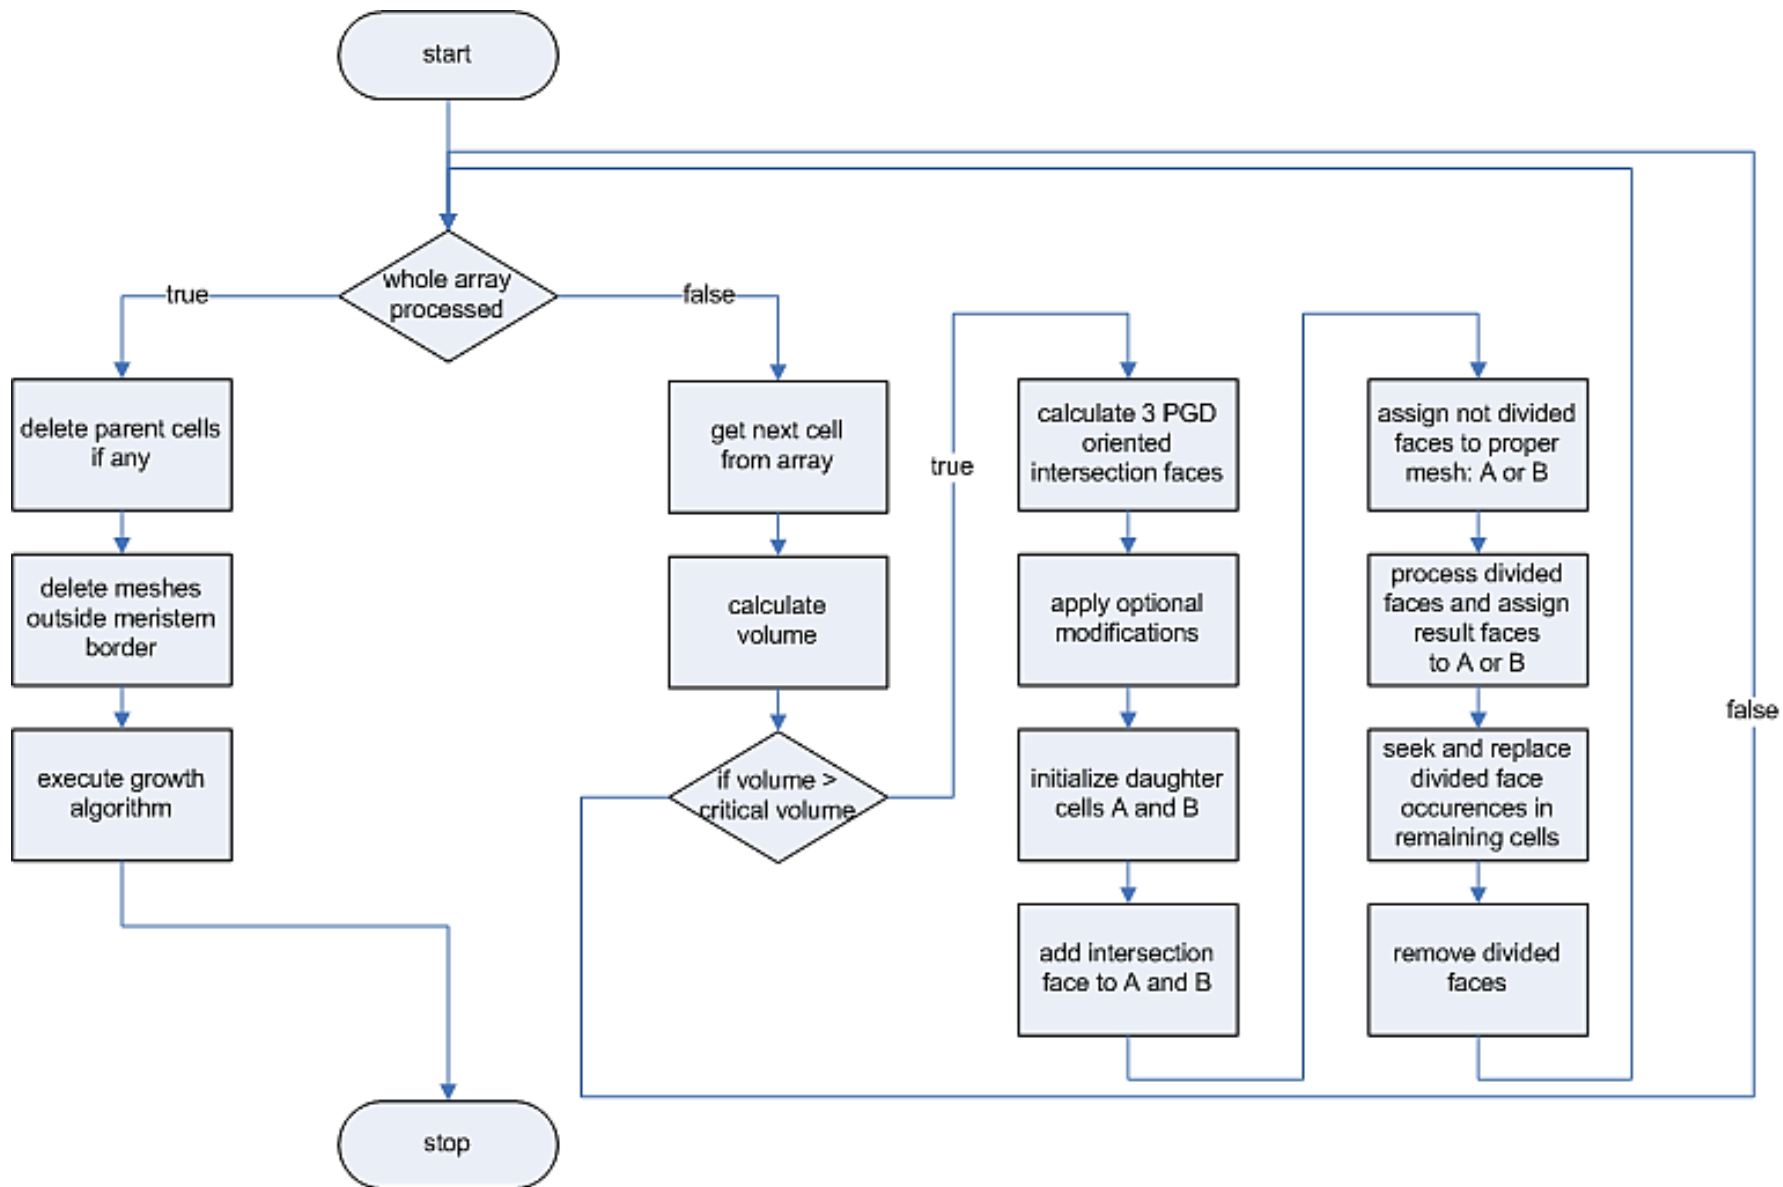

Supplement: 13007_2017_262_MOESM2_ESM.pdf [file 13007_2017_262_MOESM2_ESM.pdf]
